# Supplementary material for: iRGD and TAT co-modified PEG-PLGA nanoparticles for topical ocular delivery of panax notoginseng saponins: A novel therapeutic strategy for diabetic retinopathy
Source: Research Square preprint supplement (doi:10.21203/rs.3.rs-6817194/v1), 2025-06-05
Supplement: Supplementary file 1 [file 782fe1956485089cf7dc4118.docx]

**Table S1** Aqueous humor pharmacokinetic parameters of PNS and 5%iRGD-5%TAT co-modified PNS@PEG-PLGA NPS eye drops (*n* = 6).

| Parameters | PNS eye drops | | | | | |
| --- | --- | --- | --- | --- | --- | --- |
| NGR1 | GRg1 | GRe | GRb1 | GRd | PNS |
| *t*1/2α (h) | 33.53 ± 34.58 | 30.07 ± 36.71 | 36.49 ± 35.18 | 36.58 ± 35.02 | 11.85 ± 23.67 | 21.31 ± 30.21 |
| *t*1/2β (h) | 54.26 ± 26.24 | 60.83 ± 22.44 | 69.32 ± 10.72 | 52.60 ± 30.95 | 60.90 ± 23.80 | 69.32 ± 0.05 |
| CL/F (L·h-1·kg) | 46.19 ± 91.10 | 153.52 ± 327.46 | 5.73 ± 7.51 | 13.96 ± 11.68 | 9.49 ± 10.15 | 21.38 ± 24.15 |
| *AUC*(0~t) (μg·L-1·h) | 340.80 ± 372.66 | 1166.91 ± 2634.73 | 207.91 ± 198.04 | 582.22 ± 924.57 | 259.90 ± 503.64 | 616.97 ± 574.31 |
| *AUC*(0~∞) (μg·L-1·h) | 431.69 ± 471.59 | 1693.83 ± 3640.73 | 393.93 ± 389.15 | 1184.12 ± 1951.08 | 352.23 ± 646.54 | 1374.09 ± 1750.43 |
| *K*10 (h-1) | 19.54 ± 50.09 | 99.34 ± 209.03 | 0.67 ± 1.13 | 2.87 ± 4.05 | 78.89 ± 160.69 | 29.78 ± 49.24 |
| *K*12 (h-1) | 0.15 ± 0.26 | 0.01 ± 0.01 | 0.45 ± 0.99 | 0.01 ± 0.01 | 0.10 ± 0.28 | 0.22 ± 0.43 |
| *K*21 (h-1) | 0.08 ± 0.09 | 1.14 ± 0.83 | 0.24 ± 0.29 | 0.14 ± 0.15 | 0.59 ± 0.81 | 0.07 ± 0.08 |
| *K*a (h-1) | 13.04 ± 21.89 | 2.46 ± 3.13 | 16.80 ± 40.21 | 34.81 ± 97.87 | 1.79 ± 1.65 | 8.78 ± 13.87 |
| *MRT*(0~t) (h) | 5.64 ± 3.17 | 2.08 ± 3.00 | 7.14 ± 3.24 | 7.28 ± 4.67 | 4.72 ± 6.78 | 6.95 ± 2.16 |
| *MRT*(0~∞) (h) | 30.14 ± 54.59 | 3.63 ± 6.68 | 16.44 ± 11.25 | 16.60 ± 13.57 | 2.12 ± 1.72 | 22.53 ± 33.97 |
| *T*max (h) | 1.01 ± 0.68 | 0.86 ± 1.42 | 1.28 ± 1.31 | 4.02 ± 8.31 | 4.73 ± 8.80 | 1.28 ± 2.00 |
| *C*max (μg·L-1) | 259.78 ± 148.59 | 860.17 ± 929.98 | 206.88 ± 164.99 | 739.63 ± 392.50 | 253.21 ± 382.48 | 1832.19 ± 1467.56 |

**Table S1** Aqueous humor pharmacokinetic parameters of PNS and 5%iRGD-5%TAT co-modified PNS@PEG-PLGA NPS eye drops (*n* = 6) (continue).

| Parameters | 5%iRGD-5%TAT co-modified PNS@PEG-PLGA NPs eye drops | | | | | |
| --- | --- | --- | --- | --- | --- | --- |
| NGR1 | GRg1 | GRe | GRb1 | GRd | PNS |
| *t*1/2α (h) | 19.55 ± 30.89 | 18.47 ± 31.42 | 29.39 ± 33.94 | 18.61 ± 31.30 | 1.41 ± 0.92 | 16.53 ± 24.46 |
| *t*1/2β (h) | 52.81 ± 30.57 | 46.39 ± 31.84 | 69.32 ± 0.01 | 69.32 ± 0.01 | 25.17 ± 28.27 | 57.01 ± 24.63 |
| CL/F (L·h-1·kg) | 2.06 ± 4.03 | 4.63 ± 8.79 | 0.98 ± 1.36 | 23.57 ± 28.01 | 1.48 ± 1.60 | 27.68 ± 30.33 |
| *AUC*(0~t) (μg·L-1·h) | 1217.29 ± 711.02 | 3314.49 ± 4355.56 | 1039.45 ± 839.23 | 2570.33 ± 5221.23 | 1800.89 ± 2046.13 | 5280.01 ± 8980.22 |
| *AUC*(0~∞) (μg·L-1·h) | 1562.21 ± 743.48 | 4127.01 ± 4598.42 | 1203.75 ± 846.72 | 4101.57 ± 7291.19 | 2092.84 ± 2410.38 | 5437.38 ± 9093.85 |
| *K*10 (h-1) | 0.41 ± 0.57 | 7.34 ± 17.29 | 2.92 ± 7.44 | 133.50 ± 251.01 | 326.06 ± 919.13 | 1206.16 ± 3402.00 |
| *K*12 (h-1) | 0.41 ± 0.6 | 0.36 ± 0.98 | 0.15 ± 0.21 | 0.04 ± 0.10 | 1.62 ± 4.52 | 0.05 ± 0.09 |
| *K*21 (h-1) | 0.34 ± 0.37 | 0.53 ± 0.70 | 0.02 ± 0.02 | 0.37 ± 0.33 | 0.53 ± 1.07 | 0.07 ± 0.09 |
| *K*a (h-1) | 1.45 ± 2.51 | 2.51 ± 2.57 | 3.54 ± 8.35 | 2.24 ± 4.53 | 93.23 ± 259.64 | 5.62 ± 9.66 |
| *MRT*(0~t) (h) | 7.14 ± 2.95 | 2.89 ± 2.28 | 7.53 ± 3.56 | 5.27 ± 3.83 | 4.25 ± 2.72 | 7.12 ± 3.26 |
| *MRT*(0~∞) (h) | 10.97 ± 12.17 | 4.88 ± 5.12 | 9.70 ± 10.87 | 11.60 ± 9.71 | 5.68 ± 4.29 | 9.33 ± 8.74 |
| *T*max (h) | 3.00 ± 2.71 | 1.71 ± 1.79 | 2.13 ± 2.42 | 3.12 ± 2.66 | 1.99 ± 2.01 | 1.12 ± 0.37 |
| *C*max (μg·L-1) | 677.19 ± 349.12 | 2478.66 ± 1806.07 | 365.14 ± 134.47 | 1168.02 ± 649.29 | 399.21 ± 400.01 | 3799.65 ± 1978.30 |
| *Fr* | 3.62 | 2.44 | 3.06 | 3.46 | 5.94 | 3.96 |

**Table S2** Aqueous humor pharmacokinetic parameters of GRg1 and 10%iRGD-5%TAT co-modified GRg1@PEG-PLGA NPS eye drops (*n* = 6).

| Parameters | GRg1 eye drops | 10%iRGD-5%TAT co-modified GRg1@PEG-PLGA NPs eye drops |
| --- | --- | --- |
| *t*1/2α (h) | 3.14 ± 2.22 | 10.20 ± 23.96 |
| *t*1/2β (h) | 61.40 ± 22.38 | 19.03 ± 31.09 |
| CL/F (L·h-1·kg) | 15.53 ± 13.43 | 1.84 ± 2.23 |
| *AUC*(0~t) (μg·L-1·h) | 727.17 ± 1447.71 | 6082.83 ± 5410.56 |
| *AUC*(0~∞) (μg·L-1·h) | 1007.68 ± 1649.42 | 6791.16 ± 6167.38 |
| *K*10 (h-1) | 433.38 ± 440.46 | 70.18 ± 195.54 |
| *K*12 (h-1) | 0.01 ± 0.01 | 0.67 ± 1.09 |
| *K*21 (h-1) | 0.31 ± 0.18 | 0.88 ± 1.09 |
| *K*a (h-1) | 0.54 ± 0.41 | 7.57 ± 17.00 |
| *MRT*(0~t) (h) | 5.07 ± 3.59 | 4.39 ± 2.56 |
| *MRT*(0~∞) (h) | 5.11 ± 3.20 | 5.68 ± 4.07 |
| *T*max (h) | 2.49 ± 4.33 | 2.11 ± 1.94 |
| *C*max (μg·L-1) | 1384.44 ± 790.64 | 4512.03 ± 2540.33 |
| *Fr* |  | 6.74 |

**Table S3** Aqueous humor pharmacokinetic parameters of GRb1 and 10%iRGD-5%TAT co-modified GRb1@PEG-PLGA NPS eye drops (*n* = 6).

| Parameters | GRb1 eye drops | 10%iRGD-5%TAT co-modified GRb1@PEG-PLGA NPs eye drops |
| --- | --- | --- |
| *t*1/2α (h) | 43.68 ± 35.38 | 28.16 ± 34.17 |
| *t*1/2β (h) | 52.89 ± 30.44 | 54.54 ± 27.38 |
| CL/F (L·h-1·kg) | 3.03 ± 5.02 | 3.27 ± 5.85 |
| *AUC*(0~t) (μg·L-1·h) | 1678.14 ± 1193.11 | 6616.00 ± 10104.51 |
| *AUC*(0~∞) (μg·L-1·h) | 2226.40 ± 1564.24 | 9247.26 ± 14316.57 |
| *K*10 (h-1) | 0.51 ± 0.89 | 3088.78 ± 7972.47 |
| *K*12 (h-1) | 0.01 ± 0.01 | 0.01 ± 0.01 |
| *K*21 (h-1) | 0.72 ± 0.69 | 0.24 ± 0.19 |
| *K*a (h-1) | 0.58 ± 0.89 | 1.02 ± 1.99 |
| *MRT*(0~t) (h) | 3.61 ± 3.38 | 6.81 ± 3.42 |
| *MRT*(0~∞) (h) | 4.69 ± 5.07 | 10.69 ± 7.75 |
| *T*max (h) | 1.24 ± 1.98 | 1.17 ± 2.00 |
| *C*max (μg·L-1) | 2546.23 ± 2725.05 | 4012.40 ± 1607.13 |
| *Fr* |  | 4.15 |
